# Improved Insulin Action and Glycemic Control After Long-Term Angiotensin-Converting Enzyme Inhibition in Subjects with Arterial Hypertension and Type II Diabetes

ELISABETTA TORLONE, MD  
MARIELLA BRITTA, MD  
ANNA MARIA RAMBOTTI, MD  
GABRIELE PERRIELLO, MD

FAUSTO SANTEUSANIO, MD  
PAOLO BRUNETTI, MD  
GEREMIA B. BOLLI, MD

**OBJECTIVE** — To determine the long-term effects of the angiotensin-converting enzyme inhibitor captopril on insulin sensitivity in subjects with type II diabetes and arterial hypertension. The chronic effects of angiotensin-converting enzyme inhibition on insulin-sensitive individuals are presently controversial.

**RESEARCH DESIGN AND METHODS** — Sixteen subjects, with type II diabetes (on diet and/or diet plus oral hypoglycemic agents) and arterial hypertension, were studied. During a 1-mo run-in period no antihypertensive drugs were administered, but oral hypoglycemic agents were continued in subjects already in therapy. The subjects were then randomly assigned to two 3-mo treatment periods, with either captopril or placebo (single blind, cross-over design). At the end of each treatment period, insulin sensitivity was assessed by means of a euglycemic-hyperinsulinemic clamp (2 sequential steps, 2-h each, insulin infusion 0.25 and 1 mU · kg<sup>-1</sup> · min<sup>-1</sup>, steps 1 and 2, respectively), combined with infusion of [3-<sup>3</sup>H]glucose (for calculation of hepatic glucose output and peripheral glucose utilization, rates of glucose disappearance), and indirect calorimetry (for calculation of glucose oxidation, nonoxidative glucose metabolism, and lipid oxidation). The percentage of HbA<sub>1c</sub> was measured to assess long-term glycemic control.

**RESULTS** — Comparing data at the end of placebo and captopril treatment, captopril resulted in: lower blood pressure (systolic 154 ± 2 vs. 163 ± 3 mmHg and diastolic 93 ± 2 vs. 101 ± 2 mmHg); greater insulin sensitivity in hyperglycemic conditions (total amount of insulin infused and time of insulin infusion required to reach euglycemia, 1.73 ± 0.54 vs. 2.08 ± 0.60 U and 58 ± 8 vs. 70 ± 11 min, captopril and placebo, respectively, *P* < 0.05); greater insulin sensitivity in euglycemic conditions at liver level (hepatic glucose output 4.11 ± 0.55 vs. 5.2 ± 0.4 μmol · kg<sup>-1</sup> · min<sup>-1</sup>, step 1 of the clamp), muscle level (rates of glucose disappearance 26.1 ± 2.3 vs. 23.8 ± 2.1 μmol · kg<sup>-1</sup> · min<sup>-1</sup>, step 2 of the clamp), primarily attributable to ~29% increase in nonoxidative glucose metabolism, and adipose tissue level (plasma free fatty acid 0.185 ± 0.03 vs. 0.24 ± 0.02 mM and lipid oxidation 1.9 ± 0.3 vs. 2.21 ± 0.04 μmol · kg<sup>-1</sup> · min<sup>-1</sup> in step 1); and lower HbA<sub>1c</sub> (6.7 ± 0.2 vs. 7.3 ± 0.2%, *P* < 0.05).

**CONCLUSIONS** — Long-term captopril administration in type II diabetic subjects improves insulin sensitivity in the postprandial state, not in the fasting state, and improves glycemic control.

From the Department of Internal Medicine and Endocrinological and Metabolic Sciences, University of Perugia, 06126 Perugia.

Address correspondence and reprint requests to Geremia B. Bolli, MD, Istituto di Medicina Interna e Scienze Endocrine e Metaboliche, Via E. Dal Pozzo, 06126 Perugia, Italy.

Received for publication 5 January 1993 and accepted in revised form 1 July 1993.

Type II diabetes, non-insulin-dependent diabetes mellitus; BP, blood pressure; ACE, angiotensin-converting enzyme; OHA, oral antihyperglycemic agent; R<sub>a</sub>, rate of glucose appearance; R<sub>d</sub>, rate of glucose disappearance; FFA, free fatty acid; HPLC, high-performance liquid chromatography; HGO, hepatic glucose output; HGP, hepatic glucose production; G-STO, nonoxidative glucose metabolism; G-OX, glucose oxidation; L-OX, lipid oxidation; BMI, body mass index; FPG, fasting plasma glucose; CV, coefficient of variation; NEFA, nonesterified fatty acid; ANOVA, analysis of variance.

Type II diabetes and arterial hypertension are conditions of insulin resistance (1–6) frequently associated in the same subjects (7). Because arterial hypertension is an important cardiovascular risk factor for type II diabetic subjects, it is recommended that not only blood glucose, but also BP be meticulously controlled in subjects with both diabetes and hypertension (8). However, several widely used antihypertensive drugs, such as diuretics (9,10) and β-blockers (11,12), although effective in controlling hypertension, may exaggerate insulin resistance (9–12). Concerns have been voiced that these adverse metabolic effects may contribute to the progression of macrovascular disease, despite improved control of BP (13).

Recent studies indicate that acute administration of ACE inhibitors improves insulin action in nondiabetic and type II diabetic subjects, with or without hypertension (14–18). However, the long-term effects of ACE inhibitors on insulin action are far from being well established. In 3 studies, prolonged ACE inhibition resulted in improved insulin sensitivity (19–21), whereas in 3 different studies, no changes in insulin action were observed after long-term ACE inhibition (22–24). Although differences in experimental design and heterogeneity of subjects studied might explain the contrasting results, presently the long-term effects of ACE inhibition on insulin action and overall glycemic control in humans remain controversial.

Therefore, in view of the importance of this issue, these studies were undertaken to reassess the effects of long-term ACE inhibition on insulin action and overall glycemic control in subjects with type II diabetes and arterial hypertension.

## RESEARCH DESIGN AND METHODS

**Sixteen subjects with mild arterial hypertension and type II diabetes, recruited from the outpatient clinic of the Department of Internal Medicine**

Table 1—Clinical characteristics of type II diabetic patients

| Patient no. | Age (y)    | Sex (M/F) | BMI (kg/m <sup>2</sup> ) | FPG (mM)   | HbA <sub>1c</sub> (%)* | Sitting BP (mmHg)   | Treatment     |                                 |
|-------------|------------|-----------|--------------------------|------------|------------------------|---------------------|---------------|---------------------------------|
|             |            |           |                          |            |                        |                     | Diabetes      | Hypertension                    |
| 1           | 65         | M         | 25                       | 7          | 6.8                    | 165/98              | Diet          | None                            |
| 2           | 68         | F         | 27.2                     | 8.2        | 7.9                    | 160/100             | Glibenclamide | Diuretic                        |
| 3           | 50         | F         | 29                       | 7.8        | 6.9                    | 155/102             | Diet          | None                            |
| 4           | 64         | F         | 27.5                     | 7.2        | 6.9                    | 150/98              | Diet          | None                            |
| 5           | 63         | F         | 24                       | 6.8        | 6.5                    | 155/100             | Diet          | Metoprolol                      |
| 6           | 52         | F         | 25                       | 7.2        | 7.7                    | 160/98              | Gliclazide    | None                            |
| 7           | 63         | M         | 26.3                     | 6.9        | 6.8                    | 160/98              | Diet          | Diuretic                        |
| 8           | 57         | M         | 26.8                     | 7          | 7.5                    | 169/103             | Glibenclamide | Diuretic                        |
| 9           | 61         | F         | 26.8                     | 7.5        | 7.4                    | 158/103             | Glibenclamide | Metoprolol                      |
| 10          | 65         | M         | 26.3                     | 7          | 6.9                    | 170/104             | Metformin     | Diuretic                        |
| 11          | 64         | M         | 27                       | 6.7        | 6.6                    | 168/95              | Diet          | None                            |
| 12          | 59         | F         | 26                       | 6.6        | 6.8                    | 165/105             | Metformin     | Ca <sup>+</sup> channel blocker |
| 13          | 61         | M         | 27                       | 7          | 8.2                    | 162/102             | Diet          | None                            |
| 14          | 63         | F         | 27.6                     | 7.4        | 7.5                    | 165/100             | Metformin     | Diuretic                        |
| 15          | 64         | M         | 28.4                     | 8          | 8.4                    | 168/105             | Gliclazide    | None                            |
| 16          | 60         | M         | 27.7                     | 7.6        | 8.1                    | 170/100             | Glibenclamide | None                            |
| Mean ± SE   | 61.2 ± 1.2 | 8M/8F     | 26.7 ± 0.3               | 7.24 ± 0.1 | 7.3 ± 0.2              | 163 ± 1.5/101 ± 0.7 |               |                                 |

\*Nondiabetic subjects' values are 4–5.8%.

and Endocrinological and Metabolic Sciences, University of Perugia, were studied after obtaining fully informed consent (Table 1). Apart from hypertension and type II diabetes, the subjects were healthy and apparently free of hypertension- and/or diabetes-related complications. On recruitment, the subjects were not on medications, with the exception of subjects 2, 5, 7–10, 12, and 14, who were on antihypertensive medications, and subjects 2, 6, 8–10, 12, 14, 15, and 16, who were on OHAs.

### Study protocol

Institutional Review Board Committee approval was obtained for these studies. After an initial 4-wk run-in period—during which the antihypertensive therapy was withdrawn in subjects 2, 5, 7–10, 12, and 14, but diet and OHAs were continued in subjects 2, 6, 8–10, 12, 14, 15, and 16—baseline lying/standing BP and the percentage of HbA<sub>1c</sub> were measured. The subjects were then randomly assigned two 3-mo treatment periods, with either captopril or placebo.

This study was single blind (patient), with a cross-over design. The two treatment periods were separated by a 1-wk wash-out period, during which no antihypertensive therapy was given, while the OHAs, if any, were continued. In the captopril period, 12 subjects were started with an initial dose of 25 mg 2 times/day, whereas the remaining 4 subjects were given 50 mg 2 times/day. The dose of captopril was subsequently increased in 3 subjects, so that after the first 4 wk, 9 subjects were on 25 mg 2 times/day, and 7 were on 50 mg 2 times/day. Insulin sensitivity, as well as BP and HbA<sub>1c</sub> were measured at the end of each treatment period. The subjects were asked to keep their diet, physical activity, and life-style as constant as possible throughout the study period.

### Procedures

Insulin sensitivity was assessed in all patients by means of the euglycemic-hyperinsulinemic clamp technique (25,26), as described previously (16). In brief, the subjects were admitted to the

Clinical Research Center of the Department of Internal Medicine and Endocrinological and Metabolic Sciences, University of Perugia, between 0630 and 0700, after an overnight fast (9–10 h). All subjects were given the therapeutic dose of captopril (but not OHA, if any), placed at bed rest, and maintained in the supine position throughout the experiments. To obtain arterialized venous blood samples (27), a hand vein was cannulated in a retrograde fashion with a 19-gauge butterfly needle and the hand maintained at 60–65°C in a thermoregulated plexiglass box. An antecubital vein of the contralateral arm was cannulated with an 18-gauge catheter needle. This line was used for infusion of insulin and glucose, both radioactive ([3-<sup>3</sup>H]glucose) and nonradioactive (cold glucose). The venous and the arterialized venous lines were kept patent with an infusion of 0.9% NaCl at the rate of 0.5 ml/min by means of 2 peristaltic pumps (VM 8000 M, Vial Medical, St-Martin-Le-Vinoux, Grenoble, France).

Between 0700 and 0730, an in-

fusion of insulin (Actrapid HM U-40, Novo-Nordisk A/S, Denmark) diluted to 1 U/ml in 2 ml of the subject's whole blood and 0.9% NaCl to a final volume of 100 ml was started by means of a syringe pump (Harvard Apparatus, Ealing, South Natick, MA). This gradually decreased the plasma glucose concentration from the patient's hyperglycemic values to normal plasma glucose (4.5–5.5 mM) based on a previously described algorithm (28). Between 0900 and 0930, when plasma glucose concentration reached the target value of ~5 mM, the insulin infusion was stopped, and a primed (25  $\mu$ Ci) continuous infusion (0.25  $\mu$ Ci/min) of [ $3\text{-}^3\text{H}$ ]glucose (New England Nuclear, Boston, MA) was initiated and maintained throughout the studies for isotopic determination of rates of  $R_a$  and  $R_d$ . Three hours were allowed for isotopic equilibration, after which baseline blood samples were taken. During this period the subjects remained spontaneously euglycemic, and no insulin was infused. The euglycemic-hyperinsulinemic clamp was started between 1200 and 1230. Insulin was infused at the rate of 0.25  $\text{mU} \cdot \text{kg}^{-1} \cdot \text{min}^{-1}$  during the initial 2 h (0–120 min, low-dose insulin step, henceforth referred to as step 1) and at the rate of 1  $\text{mU} \cdot \text{kg}^{-1} \cdot \text{min}^{-1}$  during the following 2 h (121–240 min, high-dose insulin step, henceforth referred to as step 2).

During both steps of insulin infusion, cold glucose (20% solution) was infused at a variable rate to maintain plasma glucose concentration at ~5 mM, according to the principles of the glucose clamp technique (25,26). Substrate oxidation and energy expenditure were measured in all subjects by indirect calorimetry (29). Ninety minutes before the beginning of insulin infusion a transparent, plastic ventilated hood was placed over the subject's head and made airtight around the neck. Gas-exchange measurements were taken during a 45-min basal period after the subjects had adapted to the hood and stabilized their

breathing pattern. Measurements were repeated during the last 45 min of steps 1 and 2 of clamp.

### Analytical procedures

Arterialized venous blood samples were collected at 5- to 10-min intervals and assayed for glucose (determined at bedside by means of a Beckman Glucose Analyzer, Beckman Instruments, Fullerton, CA), glucose specific activity (30), insulin (31), C-peptide (32), and NEFAs by a colorimetric method using a kit (Wako Chemicals GmbH, Neuss, Germany), by previously described methods. For indirect calorimetry, air flow,  $\text{O}_2$ , and  $\text{CO}_2$  concentrations in the expired and inspired air were measured by a computerized continuous open-circuit system (Deltatrac, Datex Instruments, Helsinki, Finland) (33). Air flow was measured by the air-dilution method,  $\text{CO}_2$  concentration by a conventional infrared detector, and  $\text{O}_2$  concentration by a fast differential paramagnetic  $\text{O}_2$  sensor. The monitor has a precision of 2.5% for  $\text{O}_2$  consumption and 1.0% for  $\text{CO}_2$  production. Protein oxidation was estimated from urinary excretion of urea before and during the hyperinsulinemic-hyperglycemic clamp studies. Urine was collected immediately before the initiation of the isoglycemic-hyperinsulinemic clamp studies and then from the onset to the end of each study period for determination of glucose and nitrogen excretion, the latter measured by the method of Kjeldahl (34). The percentage of  $\text{HbA}_{1c}$  was measured by an HPLC method (35).

### Calculations

$R_a$  and  $R_d$  were calculated during the last 30 min of the basal period and throughout each of the 2 steps of the hyperinsulinemic-euglycemic clamp by using the non-steady-state equations of De Bodo et al. (36); rates were smoothed according to the method of Miles et al. (37). The infusion rate of cold glucose was integrated over 30-min intervals and subtracted from the total  $R_a$  to obtain

HGO. Negative numbers for HGP were observed only in step 2 of the clamp (1  $\text{mU} \cdot \text{kg}^{-1} \cdot \text{min}^{-1}$ ). As recently demonstrated on theoretical as well as experimental grounds (3), such an underestimation of glucose turnover by the tracer method is largely accounted for by a model error emerging at high rates of glucose metabolism.

Total body glucose metabolism was calculated by adding the mean rate of HGP (if a positive number) during the last 30 min of the baseline period and step 1 of the clamp studies to the mean glucose infusion rate during the same period, as reported previously (16,39), after subtracting the possible urinary glucose losses. However, in these studies glycosuria did not occur in any of the subjects. G-STO was calculated as the difference between total body glucose uptake and G-OX, as determined by indirect calorimetry.

Oxidation rates for carbohydrates, fat, and protein were calculated from the measured  $\text{O}_2$  consumption,  $\text{CO}_2$  production, and urinary nitrogen excretion adjusted for changes in plasma concentration of urea nitrogen (40), as reported previously (41). Whole body net L-OX is expressed in molar units by using the molecular weight of palmitate ( $M_r = 256$ ). Estimated portal plasma insulin levels were calculated based on previously reported equations (42) where the endogenous insulin secretory rate was calculated based on a two-compartment model (43).

### Statistical analysis

Data are given as means  $\pm$  SE, and the statistical significance was evaluated using ANOVA for cross-over design studies corrected for repeated measures. Regressions were calculated using the least-square method (44).

## RESULTS

### BMI, glycemic control, and BP

After a 3-mo treatment, BMI after captopril was no different as compared with

that after placebo ( $26.9 \pm 0.4$  vs.  $26.6 \pm 0.3$  kg/m<sup>2</sup>, respectively) and the run-in period (NS). HbA<sub>1c</sub> decreased slightly, but significantly by  $\sim 0.6\%$  after captopril as compared with placebo ( $6.7 \pm 0.2$  vs.  $7.3 \pm 0.2\%$ , respectively,  $P = 0.05$ ). Arterial BP was lower after captopril than after placebo (sitting, systolic  $154 \pm 2$  vs.  $163 \pm 3$  mmHg; diastolic  $93 \pm 2$  vs.  $101 \pm 2$  mmHg, respectively,  $P < 0.005$ ). In 11 subjects, BP was  $164 \pm 3/102 \pm 2$  mmHg after placebo and  $152 \pm 3/91 \pm 2$  mmHg after captopril (henceforth referred to as responders), whereas in the remaining 5 subjects it did not change significantly after captopril as compared with placebo ( $160 \pm 3/98 \pm 2$  vs.  $162 \pm 3/99 \pm 3$  mmHg, respectively, NS). These 5 subjects henceforth will be referred to as nonresponders.

#### Baseline FPG and insulin concentrations

On the morning of the study, before the intravenous insulin infusion, FPG ( $8.8 \pm 0.4$  vs.  $9.1 \pm 0.35$  mM) and insulin concentrations ( $63.3 \pm 6.2$  vs.  $59.2 \pm 5.3$  pM) after a 3-mo treatment with captopril and placebo, respectively, were not different. The total amount of insulin infused intravenously and the time required to normalize plasma glucose concentration after captopril ( $1.73 \pm 0.54$  U and  $58 \pm 8$  min) were less than those after placebo ( $2.08 \pm 0.6$  U and  $70 \pm 11$  min) ( $P < 0.05$ ). During the following 3-h equilibration period during which no insulin was infused ( $-3$  h– $0$  h), mean plasma glucose concentrations in the captopril and placebo were not different ( $5.4 \pm 0.1$  vs.  $5.05 \pm 0.1$  mM, respectively).

#### Insulin sensitivity

Baseline plasma insulin concentrations in the captopril and placebo study ( $58.4 \pm 8.15$  vs.  $50.3 \pm 7$  pM) were similar. During the insulin infusion, plasma insulin increased to similar plateau concentrations in steps 1 and 2 in the captopril ( $150.5 \pm 9$  vs.  $500 \pm 28$

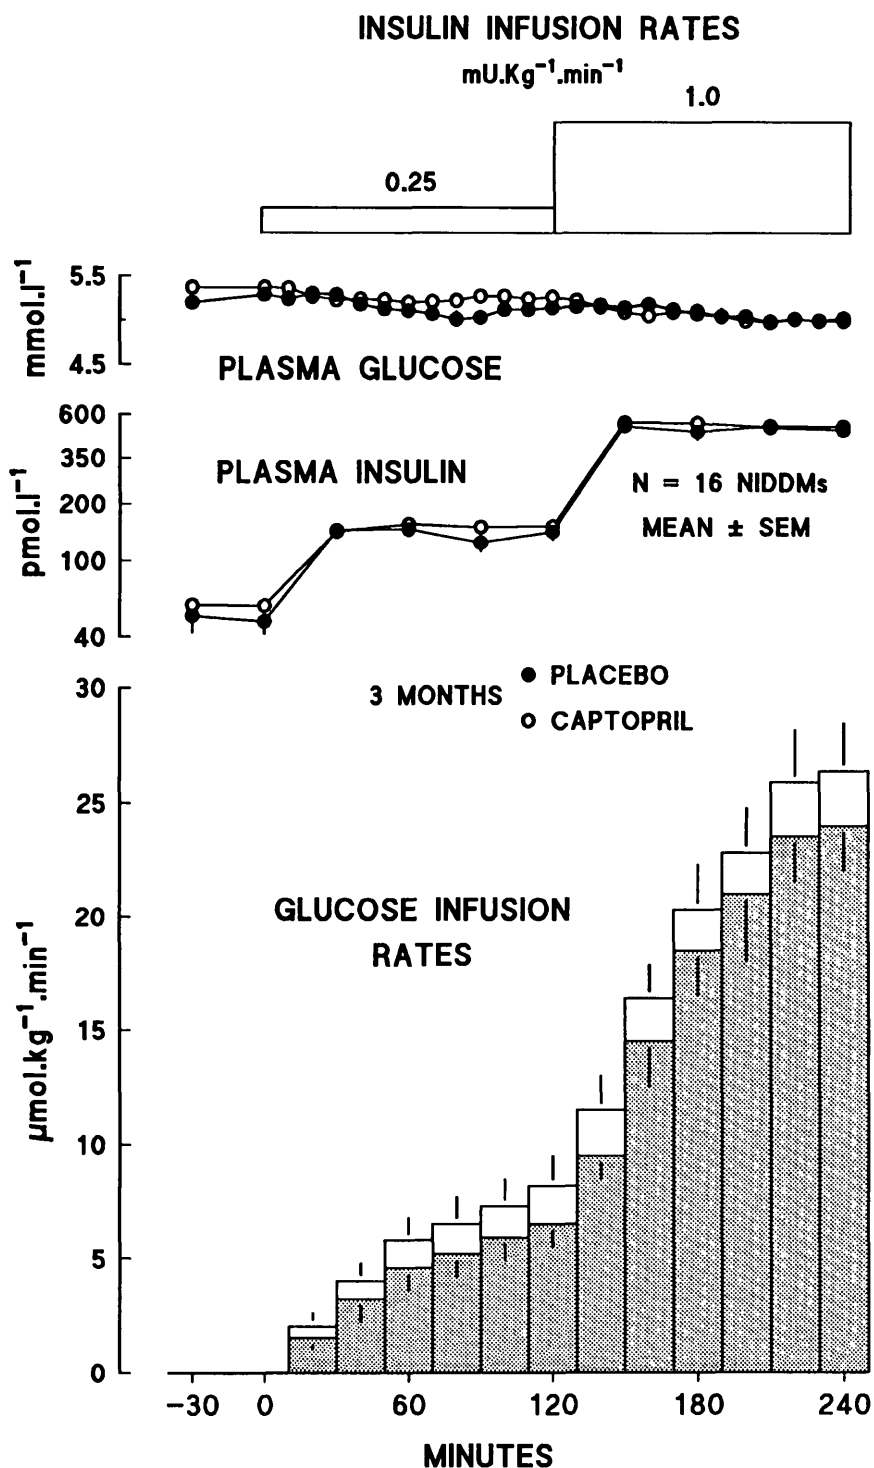

**Figure 1**—Plasma glucose, insulin concentrations, and rates of glucose infusion required to keep euglycemia during two-step hyperinsulinemia in 16 type II diabetic subjects studied after a 3-mo treatment with captopril or placebo.

pM, respectively) and placebo ( $133 \pm 13$  vs.  $517 \pm 42$  pM, respectively) study. As a result of exogenous glucose infusion, plasma glucose concentration was maintained at similar concentrations in the captopril and the placebo study ( $5.15 \pm 0.05$  vs.  $5.1 \pm 0.04$  mM, respectively) (CV of plasma glucose <5%). Baseline plasma C-peptide concentration was similar in the captopril and placebo studies and suppressed to similar values during the clamp study on both occasions (NS, data not shown). Similarly, estimated plasma portal insulin concentrations were similar during baseline and steps 1 and 2 in the captopril ( $187 \pm 11.3$ ,  $266 \pm 18$ , and  $547 \pm 28$ , respectively) and placebo studies ( $185 \pm 10$ ,  $260 \pm 20$ , and  $550 \pm 28$ , respectively) (baseline, step 1, and step 2, respectively, NS) (Fig. 1).

The rate of glucose infusion required to maintain euglycemia was greater after captopril than after placebo, both in step 1 of the clamp study ( $7.41 \pm 0.8$  vs.  $6.15 \pm 0.7$   $\mu\text{mol} \cdot \text{kg}^{-1} \cdot \text{min}^{-1}$ , respectively) as well as in step 2 ( $26.1 \pm 2.3$  vs.  $23.7 \pm 2.1$   $\mu\text{mol} \cdot \text{kg}^{-1} \cdot \text{min}^{-1}$ , respectively) ( $P < 0.05$ ). A correlation was observed between improved insulin sensitivity in the clamp studies and a decrease in the percentage of HbA<sub>1c</sub> ( $r = 0.63$ ,  $P < 0.05$ ).

### $R_a$ and $R_d$

Baseline  $R_a$ s (HGP) were similar after captopril and placebo (Fig. 2). Following initiation of the hyperinsulinemic-euglycemic clamp, captopril treatment resulted in a greater suppression of HGP compared with placebo, both in step 1 ( $4.11 \pm 0.55$  vs.  $5.20 \pm 0.4$   $\mu\text{mol} \cdot \text{kg}^{-1} \cdot \text{min}^{-1}$ , respectively) and step 2 ( $-1.8 \pm 0.2$  vs.  $-0.7$   $\mu\text{mol} \cdot \text{kg}^{-1} \cdot \text{min}^{-1}$ , respectively,  $P < 0.05$ ). However, in this last step, negative numbers of HGP were obtained, as reported previously (15,36,37).

Baseline rates of peripheral glucose utilization were similar in the captopril and placebo studies and did not

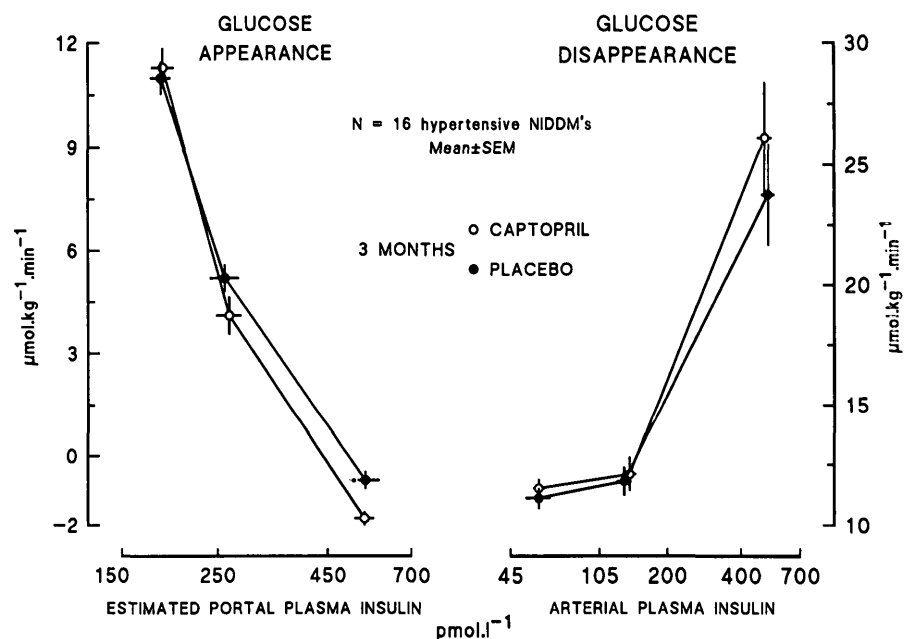

**Figure 2**— $R_a$  and  $R_d$  during two-step hyperinsulinemia in 16 type II diabetic subjects studied after a 3-mo treatment with captopril or placebo.

increase in step 1 of the clamp study. However, captopril resulted in a greater stimulation of peripheral glucose utilization in step 2 of the clamp study ( $26.1 \pm 2.3$  vs.  $23.75 \pm 2.1$   $\mu\text{mol} \cdot \text{kg}^{-1} \cdot \text{min}^{-1}$ , captopril vs. placebo, respectively,  $P < 0.05$ ).

### Rates of G-OX and G-STO

Rates of G-OX were not affected by captopril, neither at baseline nor in steps 1 and 2 of the clamp. However, captopril resulted in an increased rate of G-STO in step 2 of the clamp ( $14.5 \pm 1.8$  vs.  $11.2 \pm 1.6$   $\mu\text{mol} \cdot \text{kg}^{-1} \cdot \text{min}^{-1}$ , captopril vs. placebo,  $P < 0.05$ ) (Fig. 3).

### Plasma FFA concentration and rates of L-OX

Before the hyperinsulinemic-euglycemic clamp, plasma FFAs were no different in the captopril and placebo studies ( $0.55 \pm 0.04$  vs.  $0.51 \pm 0.5$  mM, respectively, NS). However, in step 1 of the clamp, plasma FFAs were more suppressed after captopril compared with placebo ( $0.185 \pm 0.03$  vs.  $0.24 \pm 0.02$  mM, respectively,  $P < 0.05$ ), whereas in

step 2, plasma FFAs were maximally suppressed on both occasions (Fig. 4).

Baseline L-OX was similar in the two treatment periods. L-OX was more suppressed after captopril than after placebo in step 1 of the clamp ( $1.90 \pm 0.04$  vs.  $2.21 \pm 0.04$   $\mu\text{mol} \cdot \text{kg}^{-1} \cdot \text{min}^{-1}$ , respectively,  $P < 0.05$ ), whereas it was suppressed to a similar extent after the two treatment periods in step 2.

### Correlations between BP and insulin sensitivity and between plasma FFAs and glucose turnover rates

No correlations were observed between changes in arterial BP, insulin sensitivity of glucose, and lipid metabolism, neither after placebo nor after captopril.

Similarly, no correlations were found between the suppression of plasma FFAs or L-OX and the rate of HGP or the rate of glucose utilization, neither after placebo nor after captopril.

**CONCLUSIONS**— This study indicates that long-term treatment of arterial hypertension of type II diabetic subjects

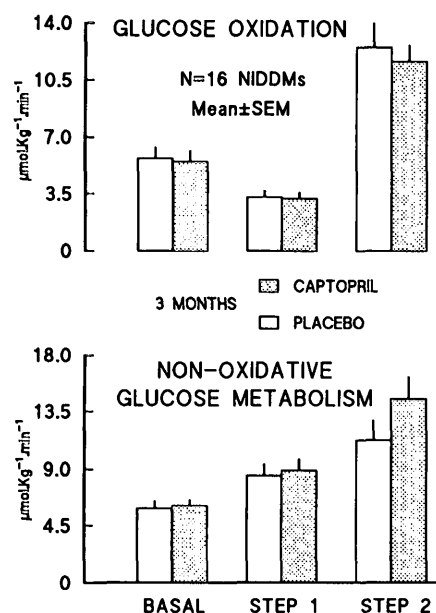

**Figure 3**—Rates of G-OX and G-STO during two-step hyperinsulinemia in 16 type II diabetic subjects studied after a 3-mo treatment with captopril or placebo.

with the ACE inhibitor captopril reduces BP and at the same time improves insulin action both in hyperglycemic and euglycemic conditions. The greater insulin sensitivity observed in these studies during captopril treatment occurred in euglycemic conditions at the level of all the target organs of insulin action, i.e., the liver, where glucose production was decreased by  $\sim 20\%$  (from  $5.6 \pm 0.6$  to  $4.1 \pm 0.55 \mu\text{mol}\cdot\text{kg}^{-1}\cdot\text{min}^{-1}$ ); the muscle, where insulin-mediated glucose utilization was increased by  $\sim 10\%$  (from  $23.8 \pm 2.1$  to  $26.1 \pm 2.3 \mu\text{mol}\cdot\text{kg}^{-1}\cdot\text{min}^{-1}$ ); and the adipose tissue, as indicated by the  $\sim 8\%$  decrease in plasma FFA concentration (from  $0.24 \pm 0.02$  to  $0.185 \pm 0.03 \text{ mM}$ ), and by the  $\sim 12\%$  decrease in the overall L-OX rate (from  $2.21 \pm 0.4$  to  $1.90 \pm 0.3 \mu\text{mol}\cdot\text{kg}^{-1}\cdot\text{min}^{-1}$ ).

Improved insulin sensitivity after captopril also occurred under hyperglycemic conditions, as indicated by the lower amount of insulin ( $1.73 \pm 0.54$  vs.  $2.08 \pm 0.6 \text{ U}$ ) and the shorter time of

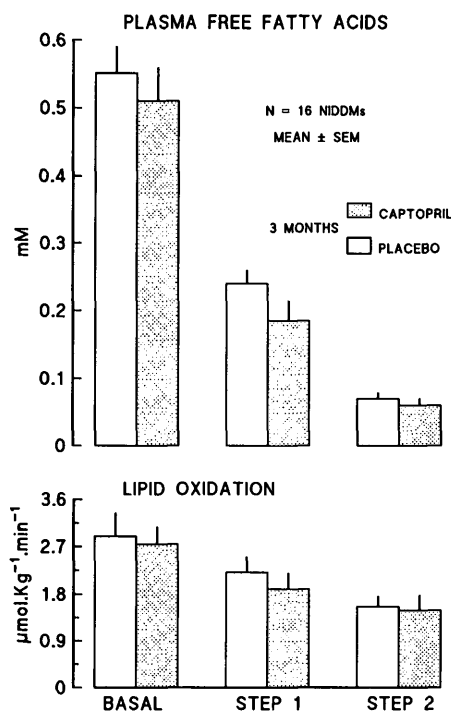

**Figure 4**—Plasma FFA during two-step hyperinsulinemia in 16 type II diabetic subjects studied after a 3-mo treatment with captopril or placebo.

insulin infusion ( $58 \pm 8$  vs.  $70 \pm 11 \text{ min}$ ) (both  $P < 0.05$ ) required to normalize FPG concentration before the hyperinsulinemic clamp. Additionally, in these studies captopril treatment resulted in a significant improvement in  $\text{HbA}_{1c}$  from  $7.3 \pm 0.2$  to  $6.7 \pm 0.2\%$ , which was correlated with the increased insulin sensitivity demonstrated in the clamp studies. This last finding indicates that the improved insulin action after captopril exerted a modest, but continuing beneficial effect on overall glycemic control. Thus, the results of these long-term studies corroborate and expand previous findings of improved insulin sensitivity in type II diabetic subjects after acute or short-term administration of ACE inhibitors (14–18).

Note that in this study the beneficial effects of ACE inhibition on insulin action did not occur at the low plasma insulin concentrations of the postabsorp-

tive state, but rather at the high plasma insulin concentrations in step 2 of the clamp study ( $\sim 500 \text{ pM}$ ), which mimics postprandial plasma insulin values. Translated into practical terms, this result would predict that long-term ACE inhibition should not affect postabsorptive glucose homeostasis in subjects with type II diabetes, but it should improve their prandial glucose tolerance. In these studies, this hypothesis is supported by the observation of a decrease in the percentage of  $\text{HbA}_{1c}$  after a 3-mo captopril treatment. Because FPG concentration did not decrease, postmeal blood glucose concentrations must sometimes have decreased to explain the lower percentage of  $\text{HbA}_{1c}$  observed after captopril.

The results of this study are in agreement with those of Paolisso et al. (19) and Vuorinen-Markkola et al. (21). The latter reported an improvement in insulin sensitivity in subjects with type II diabetes and hypertension after a 4-wk treatment with enalapril. In their double-blind, placebo-controlled study (21), ACE inhibition resulted in a marked ( $\sim 33\%$ ) increase in the rate of glucose utilization under conditions of hyperinsulinemia and euglycemia comparable with those of this and previous studies (16). Interestingly, in the study by Vuorinen-Markkola et al. (21), the increase in insulin sensitivity after ACE inhibition was of a similar magnitude to that reported in previous acute studies (16). Also in addition, the percentage of  $\text{HbA}_{1c}$  decreased from  $7.7 \pm 0.7$  to  $7.3 \pm 0.7\%$  ( $P < 0.05$ ), after long-term ACE inhibition in that study (21), as it did in these studies.

On the other hand, the results of this study are at variance with those of Seghieri et al. (24) who reported no beneficial effects of long-term ACE inhibition on insulin action and glucose tolerance in type II diabetic subjects with arterial hypertension. The differences in the experimental design of these studies likely account for the opposite conclusions in the studies by Seghieri et al. (24) as compared with this and other studies (20,

21). Seghieri et al. (24) reported in their diabetic subjects treated for 3 mo with captopril, a decrease in HbA<sub>1c</sub> of ~0.4%, which they defined as statistically non-significant. However, because the study by Seghieri et al. (24) was not placebo controlled, an effect of captopril on overall glycemic control cannot be totally excluded. Moreover, Seghieri et al. (24) concluded that insulin sensitivity did not improve after captopril. However, it should be noted that Seghieri et al. (24) used an infusion of somatostatin, insulin, and glucose in fixed amounts to estimate insulin sensitivity. This test resulted in concentrations of plasma insulin of ~300 pM and plasma glucose of ~15 mM. Under these conditions, whole body glucose utilization is greatly stimulated (45) and glycosuria occurs. Clearly, under the experimental conditions used by Seghieri et al. (24), it would be quite difficult to demonstrate a further increase in glucose utilization after captopril because of the already rather high basal glucose utilization, unless captopril were a really powerful agent capable of stimulating glucose metabolism. However, it appears in these studies that the order of magnitude of improvement in insulin action during long-term treatment with captopril is ~15% (averaging the hepatic and muscular effects). This effect was too weak to be picked up in the test of insulin sensitivity used by Seghieri et al. (24). Finally, one important difference between the studies by Seghieri et al. (24) and these studies is that the ACE inhibitor captopril was not administered on the morning of the study day before the test in the studies of Seghieri et al. (24), whereas it was administered in our studies. Because of the short duration of action of captopril on ACE inhibition (46), it is also possible that its effects on insulin action are short-lived.

In these studies, long-term ACE inhibition improved insulin action at the level of the liver, muscle, and adipose tissue. Although effects of ACE inhibitors on insulin-mediated glucose utilization have been reported previously (20, 21),

to the best of our knowledge this is the first study describing an improved insulin sensitivity at the level of the liver and adipose tissue—both playing an important role in the homeostasis of postmeal glucose tolerance (4,47). Regarding the effect of captopril on insulin-mediated glucose utilization, in these studies this effect was entirely caused by improved G-STO, i.e., primarily storage and not G-OX. Thus, captopril, and other ACE inhibitors (21), appear to interact with the key feature of insulin resistance in type II diabetes, i.e., reduced glucose storage in the muscle (1).

The mechanisms by which ACE inhibitors improve insulin action in short- (14–18) and long-term studies (20,21 and these studies) remain speculative. It might be a metabolic effect caused by the ACE inhibitor itself or mediated by greater tissue concentrations of bradikins (48). The alternative explanation might be a hemodynamic effect, i.e., an increase in blood flow (49), which would deliver greater amounts of glucose and insulin to the target organs, especially in the prandial state (50). Regardless of the mechanism(s) involved, it appears that ACE inhibitors only influence insulin sensitivity when two conditions occur at the same time, namely the bioavailability of ACE inhibitor in plasma and increased plasma insulin concentration. In this respect, it would be important to avoid use of long-acting sulfonylureas drugs, which cause inappropriate hyperinsulinemia between meals (51) in subjects with type II diabetes taking ACE inhibitors for their hypertension, and to prefer short-acting sulfonylureas or multiple daily insulin injections. In fact, it is likely that the several cases of hypoglycemia reported (14,52,53) shortly after initiation of therapy with ACE inhibitors were caused by potentiation of action of inappropriate hyperinsulinemia attributable to an excess dose of sulfonylureas by ACE inhibitors.

In conclusion, these studies indicate that long-term administration of the

ACE inhibitor captopril in type II diabetic subjects with arterial hypertension improves insulin action both in hyperglycemic (total amount of insulin infused and time of infusion of insulin required to normalize fasting plasma glucose concentration) and euglycemic condition (clamp data) and in overall glycemic control. Such a beneficial effect on glucose metabolism is quantitatively modest and might be considered as irrelevant by some clinicians (54). Nevertheless, the demonstration that ACE inhibitors improve long-term insulin sensitivity, in this and other studies (20,21), is important for two reasons. First, because hyperinsulinemia is considered a cardiovascular risk factor (6,55,56) and any therapeutic measure that reverses it, even partially, should be preferable to other therapeutic agents such as diuretics and  $\beta$ -blockers, which deteriorate insulin action (9–12). Second, care should be taken to prevent interprandial hyperinsulinemia when long-acting sulfonylureas are used in type II diabetic subjects given ACE inhibitors, because of the risk of hypoglycemia. This problem can be easily approached by frequent home blood glucose monitoring after initiation of the ACE-inhibitor therapy and consequent adjustment of sulfonylurea dose.

**Acknowledgments**—The dedicated editorial help of Patricia Boyce and support from ID and FJ & Co., Perugia, Italy, are gratefully acknowledged.

## References

1. Manicardi V, Camellini L, Bellodi G, Coscelli C, Ferrannini E: Evidence for an association of high blood pressure and hyperinsulinemia in obese man. *J Clin Endocrinol Metab* 62:1302–304, 1986
2. Ferrannini E, Buzzigoli G, Bonadonna R, Giorico MA, Oleggini M, Graziadei L: Insulin resistance in essential hypertension. *N Engl J Med* 317:350–57, 1987
3. Reaven G: Banting Lecture 1988: role of insulin resistance in human disease. *Diabetes* 37:1595–1607, 1988

4. DeFronzo RA: The triumvirate: B-cell, muscle, liver: a collusion responsible for NIDDM. *Diabetes* 37:667-87, 1988
5. Saad MF, Lillioja S, Nijomba S, Castillo C, Ferraro R, De Gregorio M, Ravussin E, Knowler WC, Bennett PH, Howard BV: Racial differences in the relation between blood pressure and insulin resistance. *N Engl J Med* 324:733, 1991
6. DeFronzo RA, Ferrannini E: Insulin resistance: a multifaceted syndrome responsible for NIDDM, obesity, hypertension, dyslipidemia, and atherosclerotic cardiovascular disease. *Diabetes Care* 14: 173-94, 1991
7. Jarret RJ: Epidemiology of macrovascular disease and hypertension in diabetes mellitus. In *International Textbook of Diabetes Mellitus*. Alberti KGMM, DeFronzo RA, Keen H, Zimmet P Eds. Chichester, Wiley, 1992, p. 1459-70
8. The Working Group on Hypertension in Diabetes: statement on hypertension in diabetes mellitus. *Arch Intern Med* 147: 830-42, 1987
9. Furman BL: Impairment of glucose tolerance produced by diuretics and other drugs. *Pharmacol Ther* 122:613-49, 1981
10. Dimitriadis G, Leighton B, Parry-billings M, Newsholme EA: Effects of the diuretic furosemide on the sensitivity of glycolysis and glycogen synthesis to insulin in the soleus muscle of the rat. *Diabetologia* 31: 58-61, 1988
11. Ostman J:  $\beta$ -adrenergic blockade and diabetes mellitus: a review. *Acta Med Scand* 672 (Suppl.):69-77, 1983
12. Pollare T, Lithell H, Selinus I, Berne C: Sensitivity to insulin during treatment with atenolol and metoprolol: a randomised, double blind study of effects on carbohydrate and lipoprotein metabolism in hypertensive patients. *Br Med J* 298:1152-57, 1989
13. Pool PE, Seagren SC, Salel AF: Metabolic consequences of treating hypertension. [00ae]MDULBR[00af]Am J Hypertens 4:494S-502S, 1991
14. Ferriere M, Lachkar H, Richard JL, Bringer J, Orsetti A, Mirouze J: Captopril and insulin sensitivity. *Ann Intern Med* 102:134-35, 1985
15. Jauch KW, Hartl W, Guenther B, Wickl-mayr M, Rett K, Dietze G: Captopril enhances insulin responsiveness of forearm muscle tissue in non-insulin-dependent diabetes mellitus. *Eur J Clin Invest* 17: 448-54, 1987
16. Torlone E, Rambotti AM, Perriello G, Botta G, Santeusano F, Brunetti P, Bolli GB: ACE-inhibition increases hepatic and extrahepatic sensitivity to insulin in patients with type II diabetes mellitus and arterial hypertension. *Diabetologia* 34:119-25, 1991
17. De Feo P, Torlone E, Perriello G, Fanelli C, Epifano L, Di Vincenzo A, Modarelli F, Motolese M, Brunetti P, Bolli GB: Short-term metabolic effects of the ACE-inhibitors benazepril in type II diabetes mellitus associated with arterial hypertension. *Diabetes Metab Rev* 18:283-88, 1992
18. Gans ROB, Bilo HJG, Nauta JJP, Popp-Snijders P, Donker AJM: The effect of angiotension-I converting enzyme inhibition on insulin action in healthy volunteers. *Eur J Clin Invest* 21:527-33, 1991
19. Pollare T, Lithell H, Berne C: A comparison of the effects of hydrochlorothiazide and captopril on glucose and lipid metabolism in patients with hypertension. *N Engl J Med* 321:868-73, 1989
20. Paolisso G, Gambardella A, Verza M, D'Amore A, Sgambato S, Varricchio M: ACE inhibition improves insulin-sensitivity in aged insulin-resistant hypertensive patients. *J Hum Hypertens* 6:175-79, 1992
21. Vuorinen-Markkola H, Ykj-Jarvinen H: Antihypertensive therapy with enalapril improves glucose storage and insulin sensitivity in hypertensive type II diabetic patients (Abstract). *Diabetologia* 35 (Suppl. 1):A93, 1992
22. Seefeldt T, Orskov L, Rasmussen O, Pedersen MM, Moller N, Christiansen JS, Schmitz O: Lack of effects of angiotensin-converting enzyme inhibitors on glucose metabolism in insulin-dependent diabetes mellitus. *Diabetic Med* 7:700-04, 1990
23. Santoro D, Natali A, Palombo C, Brandi LS, Piatti M, Ghione S, Ferrannini, E: Effects of chronic angiotensin-converting enzyme inhibition on glucose tolerance and insulin sensitivity in essential hypertension. *Hypertension* 20:181-91, 1992
24. Seghieri G, Yin W, Boni C, Sanna G, Anichini R, Bartolomei G, Ferrannini E: Effect of chronic ACE inhibition on glucose tolerance and insulin sensitivity in hypertensive type II diabetic patients. *Diabetic Med* 9:732-38, 1992
25. Andres R, Swerdloff T, Pozefsky T, Coleman D: Manual feedback technique for the control of blood glucose concentration. In *Automatism in Analytical Chemistry*. Skeggs LT Jr, Ed., New York, Mediad, 1966, p. 486-91
26. DeFronzo RA, Tobin JD, Andres R: Glucose clamp technique: a method for quantifying insulin secretion and resistance. *Am J Physiol* 237:E214-E223, 1979
27. McGuire E, Helderma J, Tobin J, Andres R, Berman M: Effects of arterial versus venous sampling on analysis of glucose kinetics in man. *J Appl Physiol* 41: 565-73, 1976
28. De Feo P, Perriello G, Ventura MM, Calcinaro F, Basta G, Lolli C, Cruciani C, Dell'Olio A, Santeusano F, Brunetti P, Bolli GB: Studies on overnight insulin requirements and metabolic clearance rate of insulin in normal and diabetic man: relevance to the pathogenesis of the dawn phenomenon. *Diabetologia* 29: 475-80, 1986
29. Jequier E: Direct and indirect calorimetry in man. In *Substrate and Energy Metabolism*. Garrow JS, Halliday D, Eds., London, Wiley 1985, p. 82-92
30. Rizza R, Cryer P, Gerich J: Role of glucagon, catecholamines, and growth hormone in human glucose counterregulation. *J Clin Invest* 64:62-71, 1979
31. Herbert V, Lav KS, Gottlieb G, Bleicher SJ: Coated charcoal immunoassay of insulin. *J Endocrinol Metab* 25:1375-79, 1965
32. Faber O, Binder C, Markussen J, Heding L, Naithand V, Kuzuya H, Blix P, Horwitz D, Rubenstein A: Characterization of seven C-peptide antisera. *Diabetes* 27 (Suppl. 1):170-77, 1978
33. Merilainen PT: Metabolic monitor. *Int J Clin Monit Comput* 4:167-177, 1987
34. Hawk PB: Kjeldhal method. In *Practical Physiological Chemistry*. 12th ed. To-



- ronto, 1947, p. 814–22
35. Cole RA, Soeldner JS, Dunn PJ, Bunn HF: A rapid method for the determination of glycosylated hemoglobins using high pressure liquid chromatography. *Metabolism* 27:289–301, 1978
  36. De Bodo R, Steele R, Altzuler N, Dunn A, Bishop J: On the hormonal regulation of carbohydrate metabolism: studies with C<sup>14</sup> glucose. *Recent Progr Horm Res* 19: 445–48, 1963
  37. Miles J, Haymond M, Gerich J: Effects of free fatty acids, insulin, glucagon and adrenaline on ketone body production in humans. In *Metabolic Acidosis*, Ciba Foundation Symposium 87, London, Pitman Books, 1982, p. 192–213
  38. Cobelli C, Mari A, Ferrannini E: The non-steady state problem: error analysis of Steele's model and new developments for glucose kinetics. *Am J Physiol* 252: E679–E689, 1987
  39. Perriello G, De Feo P, Torlone E, Fanelli C, Santeusano F, Brunetti P, Bolli GB: Nocturnal spikes of growth hormone secretion cause the dawn phenomenon in type I diabetes by decreasing hepatic (and extrahepatic) sensitivity to insulin in the absence of insulin waning. *Diabetologia* 33:52–59, 1990
  40. Tappy L, Owen OE, Boden G: Effect of hyperinsulinemia on urea pool size and substrate oxidation rates substrate oxidation rates. *Diabetes* 37:1212–16, 1988
  41. Ferrannini E: The theoretical basis of indirect calorimetry: a review. *Metabolism* 37:287–301, 1988
  42. De Feo P, Perriello G, De Cosmo S, Ventura MM, Campbell PJ, Brunetti P, Gerich JE, Bolli GB: Comparison of glucose counterregulation during short-term and prolonged hypoglycemia in normal humans. *Diabetes* 35:563–69, 1986
  43. Eaton R, Allen R, Schade D, Erikson K, Standefer J: Prehepatic insulin production in man, kinetic analysis using peripheral connecting peptide behaviour. *J Clin Endocrinol Metab* 51:520–28, 1980
  44. Zar J: *Biostatistical Analysis*. Englewood Cliffs, NJ, Prentice Hall, 1974
  45. Gottesman I, Mandarino L, Gerich JE: Use of glucose uptake and glucose clearance for the evaluation of insulin action in vivo. *Diabetes* 33:184–91, 1984
  46. Salvetti A: Newer ACE inhibitors: a look at the future. *Drugs* 40:800–28, 1990
  47. Gerich JE: Role of insulin resistance in the pathogenesis of NIDDM. *Balliere's Clin Endocrinol Metab* 2:307–26, 1988
  48. Dietze GJ: Modulation of the action of insulin in relation to the energy state in skeletal muscle: possible involvement of kinins and prostaglandins. *Mol Cell Endocrinol* 25:127–49, 1982
  49. Johns DW, Ayers CR, Williams SC: Dilatation of forearm blood vessels after angiotensin-converting-enzyme inhibition by captopril in hypertensive patients. *Hypertension* 6:545–50, 1984
  50. Junichi K, Shigehiro K, Kiyishi T, Akira I, Shyoji K, Jun I: Effects of captopril on glucose concentration: possible role of augmented postprandial forearm blood flow. *Diabetes Care* 13:1109–11, 1991
  51. Trovati M, Burzacca S, Mularoni E, Masuccio P, Cavalot F, Mattiello L, Anfossi G: Occurrence of low blood glucose concentrations during the afternoon in type II diabetic patients on oral hypoglycemic agents: importance of blood glucose monitoring. *Diabetologia* 34:662–67, 1991
  52. McMurray J, Fraiser DM: Captopril, enalapril and blood glucose (Letter). *Lancet* 1:1447, 1986
  53. Arauz-Pacheco C, Ramirez LC, Rios JM, Raskin P: Hypoglycemia induced by angiotensin-converting enzyme inhibitors in patients with non-insulin-dependent diabetes receiving sulphonylurea therapy. *Am J Med* 89:811–13, 1990
  54. Sawicki PT, Muhlaiser I, Baba T, Berger M: Do angiotensin converting enzyme inhibitors represent a progression in diabetes mellitus? *Diabetologia* 33:121–24, 1990
  55. Ferrannini E, Hoffner SM, Mitchell BD, Stern MP: Hypertension: the key feature of cardiovascular and metabolic syndrome. *Diabetologia* 34:356–61, 1991
  56. Fontbonne A, Charles MA, Thibault N, Richard JL, Claude JR, Warnet JM, Rosselin GE, Eschgewègè E: Hyperinsulinemia as a predictor of coronary heart disease mortality in a healthy population: the Paris prospective study, 15 years follow-up. *Diabetologia* 34:356–61, 1991
